# Supplementary material for: Osteopathic Manipulative Treatment for Pediatric Conditions: An Update of Systematic Review and Meta-Analysis
Source: MDPI journal article supplement (doi:10.3390/jcm11154455), 2022-07-30
Supplement: s1 [file s1]

Supplement File S2. Search strategy for MEDLINE

```
# Query Results from 9 Nov 2021
1 Osteopath$.ti,ab.
2 (Osteopath$ adj3 manipulat$).mp.
3 (Osteopath$ adj5 therap$).mp.
4 (Osteopath$ adj5 treatment).mp.
5 (Osteopath$ adj5 medic$).mp.
6 (Osteopath$ adj5 (viscera$ or cranial or craniosacral or nervous or neural or
musculoskelet$ or nonmusculoskeletal or non-musculoskelet$)).ti,ab.
7 (manual adj2 therap$).ti,ab.
8 (manual adj2 medic$).ti,ab.
9 Spencer Technique$.ti,ab.
10 Jones Technique$.ti,ab.
11 Strain- Counter Strain.ti,ab.
12 Positional Release Technique$.ti,ab.
13 Viscera$ Manipulation$.ti,ab.
14 Cranial Osteopath$.ti,ab.
15 Cranio-Sacral Technique$.ti,ab.
16 Myofascial release.ti,ab.
17 Soft tissue release.ti,ab.
18 Muscle energy technique$.ti,ab.
19 (hand$ adj therap$).ti,ab.
20 (bone$ adj setter$).ti,ab.
21 (bone$ adj setter$).ti,ab.
22 (bodywork adj3 therap$).ti,ab.
23 (mobili?ation$ adj3 spin$).ti,ab.
24 (spin $ adj3 adjustment$).ti,ab.
25 High velocity thrust$.ti,ab.
26 Low amplitude thrust$.ti,ab.
27 HVLA.ti,ab.
28 Manipulat$ therap$.ti,ab.
29 Manipulat$ joint$.ti,ab.
30 Subluxation$.ti,ab.
31 exp osteopathic medicine/
32 exp manipulation, spinal/
33 exp musculoskeletal manipulations/
34 exp manipulation osteopathic/
35 exp alternative medicine/
36 exp Complementary Therapies/
37 manipulation, osteopathic.sh.
38 osteopathic medicine.sh.
39 OMT.tw.
```

40 osteopath\$.tw.  
 41 1 or 2 or 3 or 4 or 5 or 6 or 7 or 8 or 9 or 10 or 11 or 12 or 13 or 14 or 15 or 16 or 17 or  
 18 or 19 or 20 or 21 or 22 or 23 or 24 or 25 or 26 or 27 or 28 or 29 or 30 or 31 or 32 or 33 or  
 34 or 35 or 36 or 37 or 38 or 39 or 40  
 42 randomized controlled trial.pt.  
 43 (clin\$ adj5 trial\$).ti,ab.  
 44 (((singl\$ or doubl\$ or tripl\$ or trebl\$) adj5 blind\$ or mask\$) or sham).ti,ab.  
 45 random\$.ti,ab.  
 46 control\$.ti,ab.  
 47 prospectiv\$.ti,ab.  
 48 exp clinical trial/  
 49 follow-up studies/ or prospective studies/  
 50 double-blind method/ or random allocation/ or single-blind method/  
 51 exp Research Design/  
 52 42 or 43 or 44 or 45 or 46 or 47 or 48 or 49 or 50 or 51  
 53 exp Infant/  
 54 (infant\$ or infancy or newborn\$ or baby\$ or babies or neonat \$ or preterm\$ or  
 prematur\$).tw.  
 55 exp Child/  
 56 (child\$ or schoolchild\$ or school age\$ or preschool\$ or kid or kids or toddler\$).tw.  
 57 Adolescent/  
 58 (adoles\$ or teen\$ or boy\$ or girl\$).tw.  
 59 Minors/  
 60 Puberty/  
 61 (minor\$ or pubert\$ or pubescen\$).tw.  
 62 exp Pediatrics/  
 63 (pediatric\$ or paediatric\$).tw.  
 64 exp Schools/  
 65 (nursery school\$ or kindergar\$ or primary school\$ or secondary school\$ or elementary  
 school\$ or high school\$ or highschool\$).tw.  
 66 53 or 54 or 55 or 56 or 57 or 58 or 59 or 60 or 61 or 62 or 63 or 64 or 65 4,863,996  
 67 41 and 52 and 66  
 68 limit 67 to yr="2012 - 2021"
